# Supplementary material for: Immunization of Nile Tilapia (Oreochromis niloticus) Broodstock with Tilapia Lake Virus (TiLV) Inactivated Vaccines Elicits Protective Antibody and Passive Maternal Antibody Transfer
Source: MDPI journal article supplement (doi:10.3390/vaccines10020167), 2022-01-21
Supplement: s1 [file s1]

## Supplement data

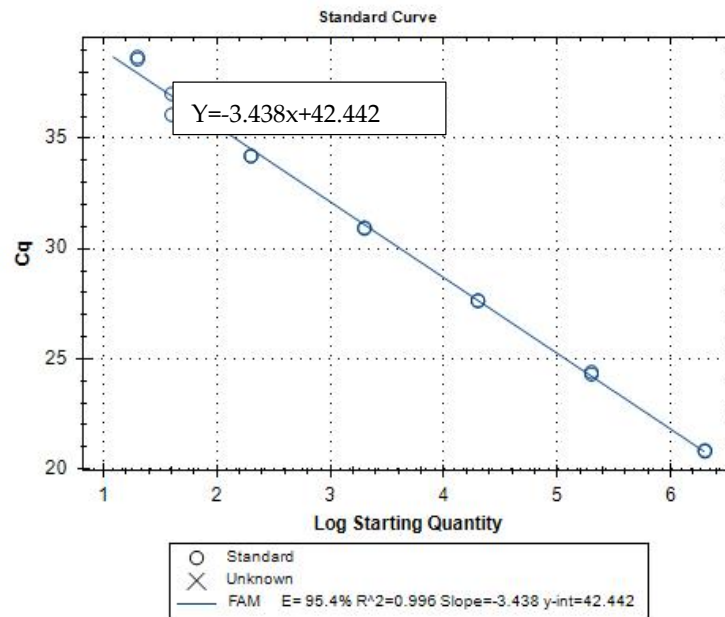

**Figure S1.** Standard curve for viral load calculation.

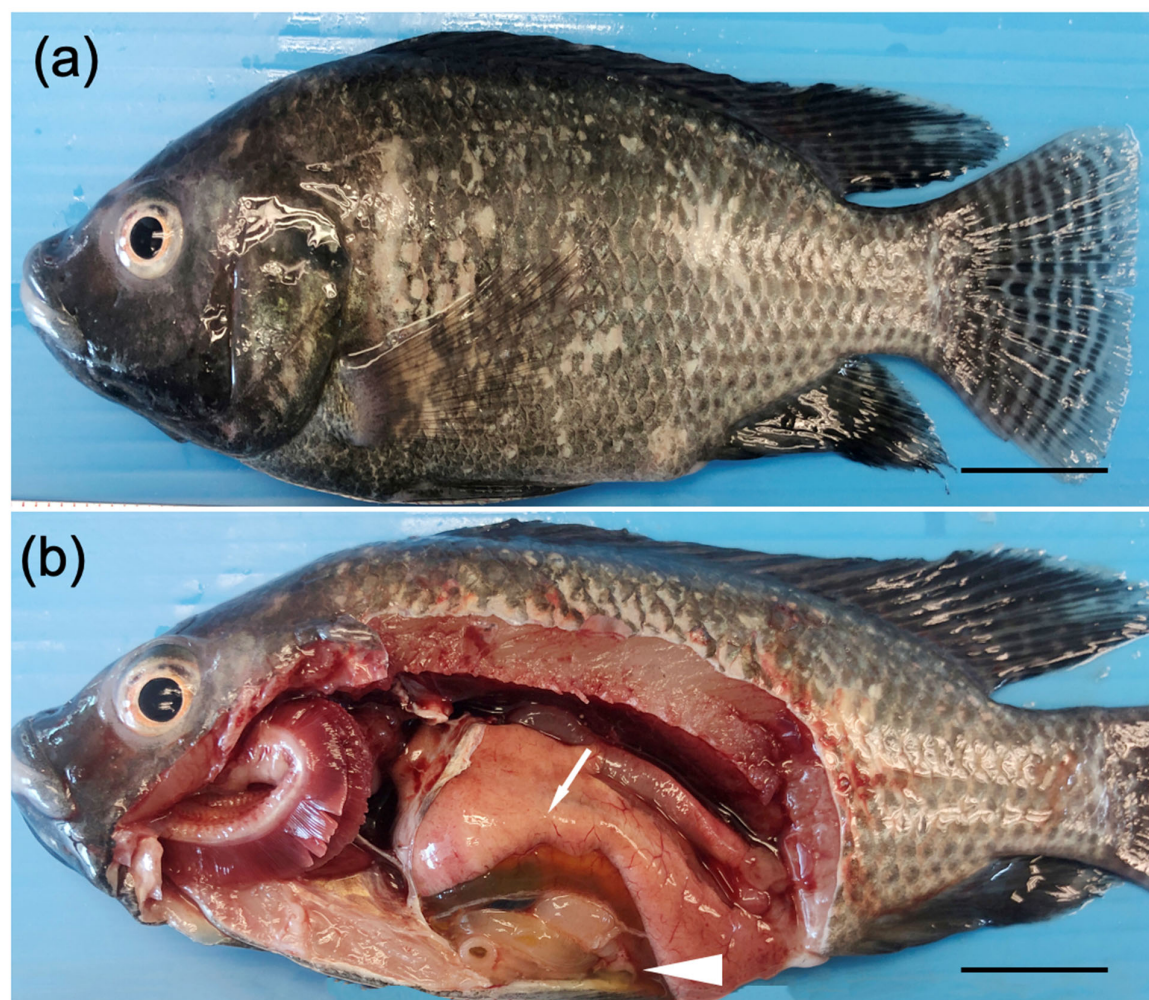

**Figure S2.** (a) Gross lesions of infected fish showed scale erosion, skin lesions, discoloration. (b) Internal postmortem changes including gill pallor, liver pallor (arrow) and ascitic fluid (head arrow). Sample was taken on 6 dpc from group 3. Scale bar = 1 cm.

**Table S1.** TiLV copy number measured by RT-qPCR targeting RNA segment 9.

| Fish No | Group | Time of death | C <sub>q</sub> for TiLV segment 9 | C <sub>q</sub> for <i>EF1α</i> | Viral copy number/μg RNA template |
|---------|-------|---------------|-----------------------------------|--------------------------------|-----------------------------------|
| 1       | 3     | Day 2         | 31.54                             | 19.95                          | $7.4 \times 10^3$                 |
| 2       | 3     | Day 6         | 22.7                              | 19.52                          | $1.4 \times 10^6$                 |
| 3       | 3     | Day 8         | 37.27                             | 20.16                          | $1.6 \times 10^2$                 |
| 4       | 3     | Day 9         | ND                                | 19.52                          | 0                                 |
| 5       | 3     | Day 11        | 38.37                             | 19.62                          | $7.5 \times 10$                   |
| 6       | 3     | Day 12        | 36.15                             | 20.76                          | $3.4 \times 10^2$                 |
| 7       | 3     | Day 16        | 36.99                             | 21.15                          | $1.8 \times 10^2$                 |
| 8       | 3     | Day 16        | 34.22                             | 21.95                          | $1.2 \times 10^3$                 |
| 9       | 3     | Day 16        | ND                                | 19.43                          | 0                                 |
| 10      | 3     | Day 16        | 36.74                             | 21.01                          | $2.3 \times 10^2$                 |
| 11      | 3     | Day 17        | 39.93                             | 19.41                          | $2.5 \times 10$                   |
| 12      | 1     | Day 10        | ND                                | 19.81                          | 0                                 |
| 13      | 2     | Day 10        | ND                                | 20.11                          | 0                                 |
| 14      | 1     | Day 21        | ND                                | 21.01                          | 0                                 |
| 15      | 1     | Day 21        | ND                                | 20.91                          | 0                                 |
| 16      | 1     | Day 21        | ND                                | 21.04                          | 0                                 |

|    |   |        |    |       |   |
|----|---|--------|----|-------|---|
| 17 | 1 | Day 21 | ND | 21.21 | 0 |
| 18 | 1 | Day 21 | ND | 20.90 | 0 |
| 19 | 2 | Day 21 | ND | 21.79 | 0 |
| 20 | 2 | Day 21 | ND | 22.40 | 0 |
| 21 | 2 | Day 21 | ND | 20.24 | 0 |
| 22 | 2 | Day 21 | ND | 21.58 | 0 |
| 23 | 2 | Day 21 | ND | 21.25 | 0 |
| 24 | 3 | Day 21 | ND | 22.44 | 0 |
| 25 | 3 | Day 21 | ND | 20.37 | 0 |
| 26 | 3 | Day 21 | ND | 19.06 | 0 |
| 27 | 3 | Day 21 | ND | 19.59 | 0 |
| 28 | 3 | Day 21 | ND | 22.31 | 0 |

ND: not detectable; C<sub>q</sub>: quantification cycle; *EF1α*: *elongation factor-1α* gene.
